# Supplementary material
Source: PubMed Central journal article supplement (PMC8542631)
Supplement: NIHMS1722120-supplement-1.pdf [file NIHMS1722120-supplement-1.pdf]

## Supplementary Material

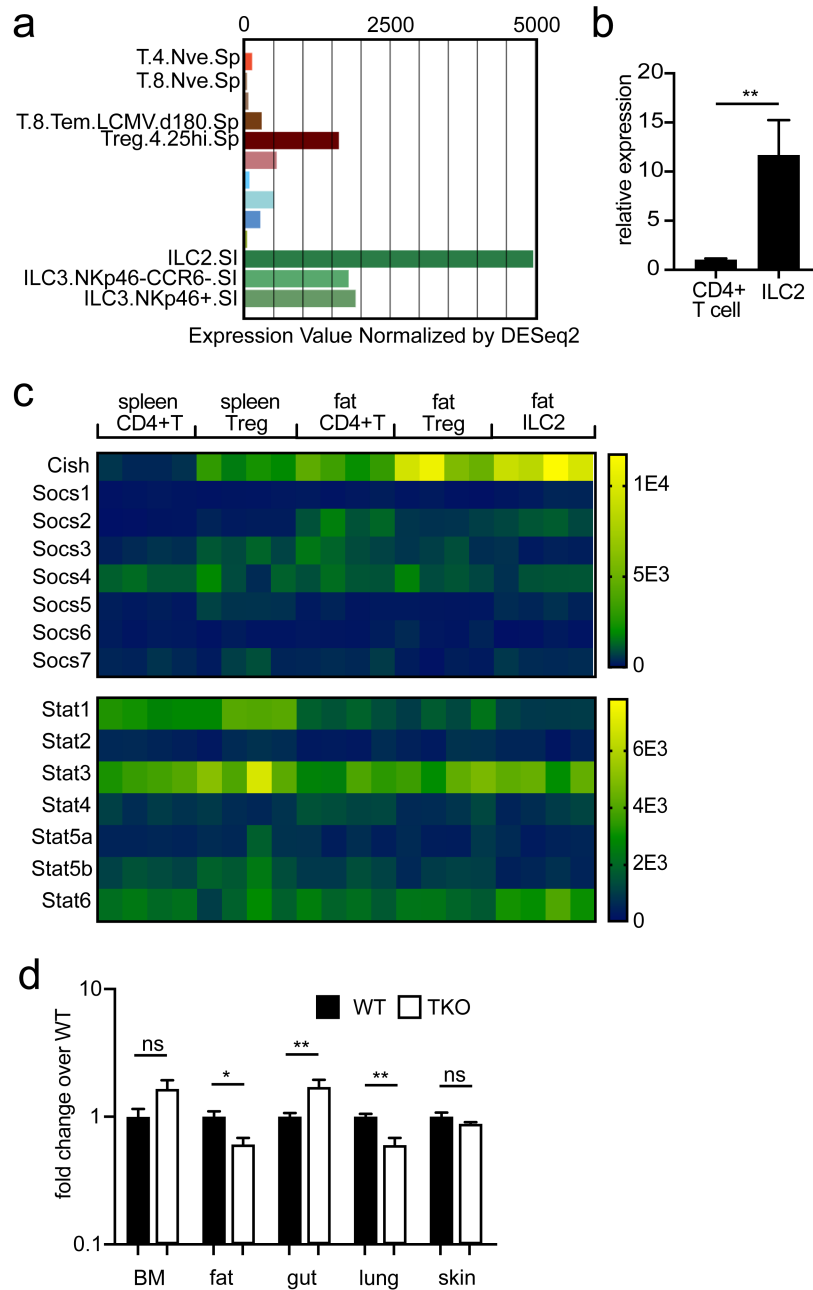

Supplementary Figure 1: CISH is highly expressed in tissue ILC2s. **a** *Cish* is highly expressed in ILC2s compared to other leukocytes. Data adapted from ImmGen. **b** Expression of *Cish* in lung ILC2s or CD4+ T cells. \*\* $p < 0.01$  by 2-tailed t-test.  $n = 4$  mice/tissue. **c** RNA sequencing from purified ILC2s from multiple tissues ILC2s as compared to other tissue resident lymphocytes.

Legend colors indicate counts per million reads. **d** *Cish* expression in WT or  $Il25^{-/-}/Cr1f2^{-/-}/Il1r1^{-/-}$  (“TKO”) mice. \* $p < 0.05$ , \*\* $p < 0.01$ , ns=non-significant by unpaired t-test. n = 3-7 mice/group.

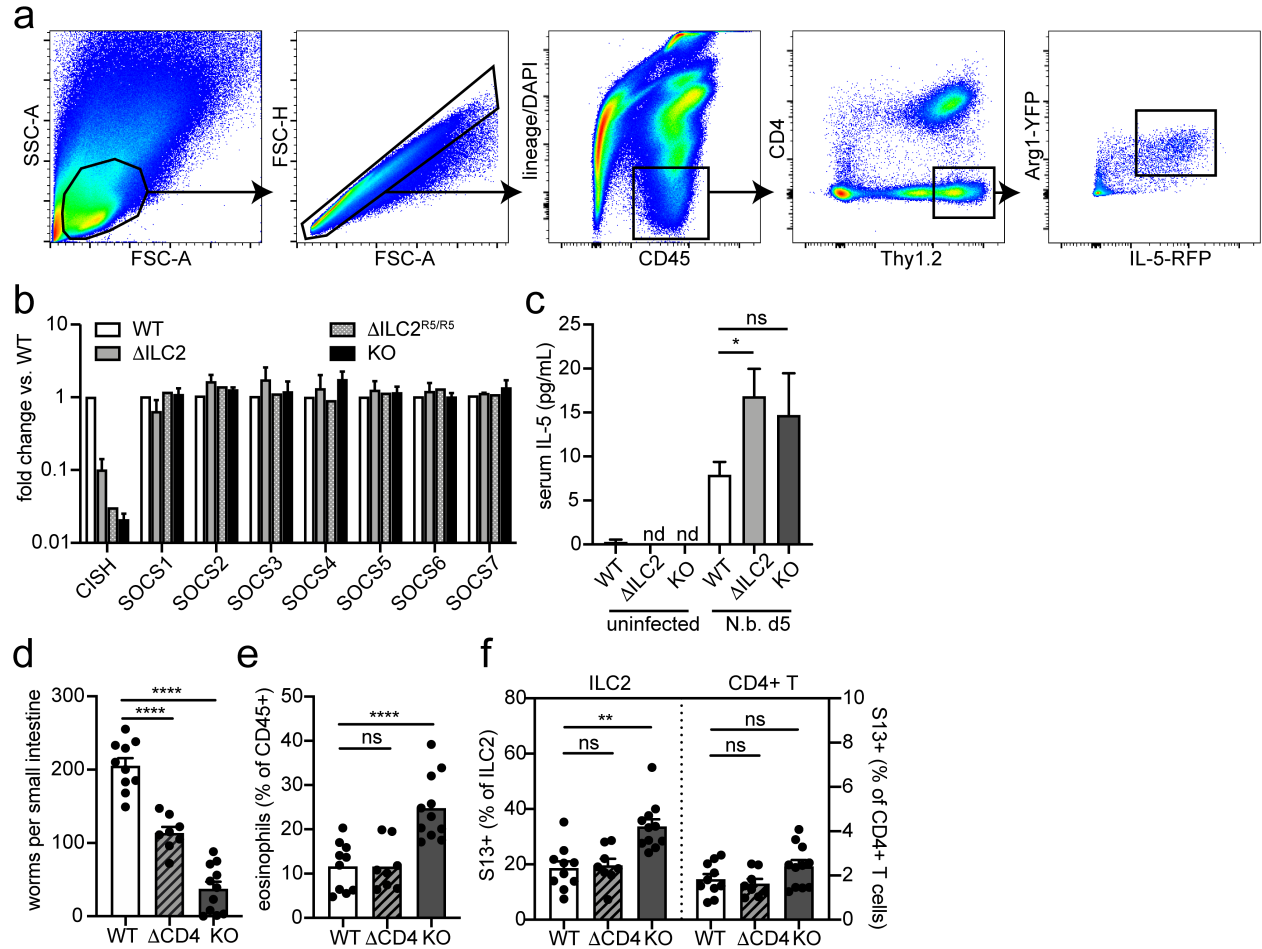

Supplementary Figure 2: CISH knockdown in ILC2s or T cells leads to augmented immunity to helminth challenge. **a** Representative gating strategy for lung ILC2s. **b** Expression of *Cish* and

other SOCS family members in lung ILC2s measured by qPCR.  $\Delta$ ILC2<sup>R5/R5</sup> indicates

homozygous expression of R5. Statistics shown for *Cish* in Figure 1a; all others non-significant.

n = 3 mice/group. **c** Serum IL-5 measured at day 5 of infection with *N.b.* as in Figure 2. \*p<0.05.

n = 6 mice/group. **d** Number of *N.b.* worms in SI on day 5. \*\*\*\*p<0.0001 for one-way ANOVA

with Dunnett testing for multiple comparisons. n = 8-11 mice/group; data pooled from 2 similar

experiments. **e** Lung eosinophils on infection day 5. \*\*\*p<0.001; ns = non-significant for one-way

ANOVA with Dunnett testing for multiple comparisons. n = 8-11 mice/group; data pooled from 2

similar experiments. **f** IL-13 expression (S13) on ILC2s or CD4+ T cells at day 5 of infection.

\*\* $p < 0.01$  for Brown-Forsythe and Welch ANOVA with Dunnett correction for multiple comparison. ns=non-significant. n = 8-11 mice/group pooled from 2 similar experiments.

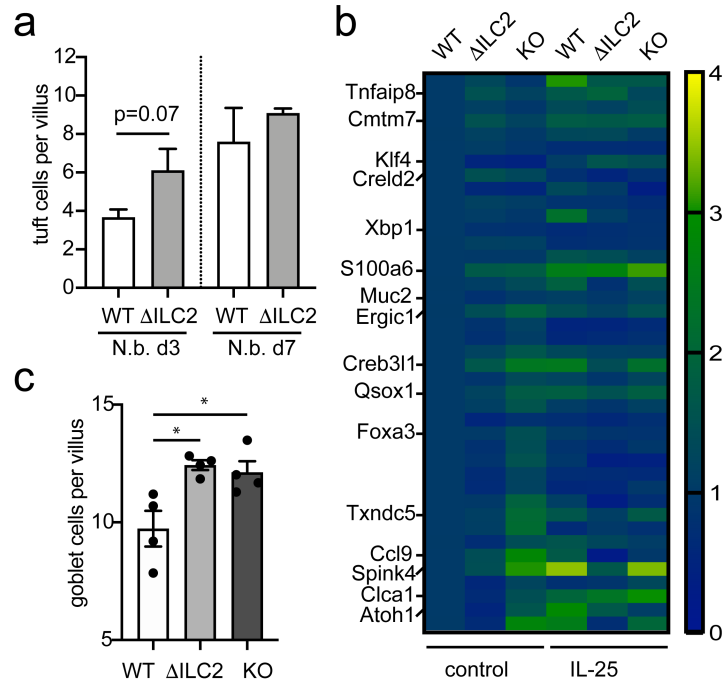

**Supplementary Figure 3: CISH constraint of ILC2 outputs controls secretory cell development in the intestine.** **a** Tuft cells per villus counted from immunofluorescence staining of intestines from *N.b.*-infected mice at indicated timepoints. Numbers indicate average  $\pm$  SEM over a minimum of 10 intact villi from each of 4-5 mice/group. **b** Goblet cell markers in whole intestinal tissue harvested from IL-25- or untreated mice. Each block represents row-normalized mean expression in 3 mice/group. **c** Goblet cells counted from PAB-stained sections of untreated mice of indicated genotypes. Numbers indicate average  $\pm$  SEM over a minimum of 10 intact villi from each of 4 mice/group. \* $P < 0.05$  by one-way ANOVA with Dunnett testing for multiple comparisons.

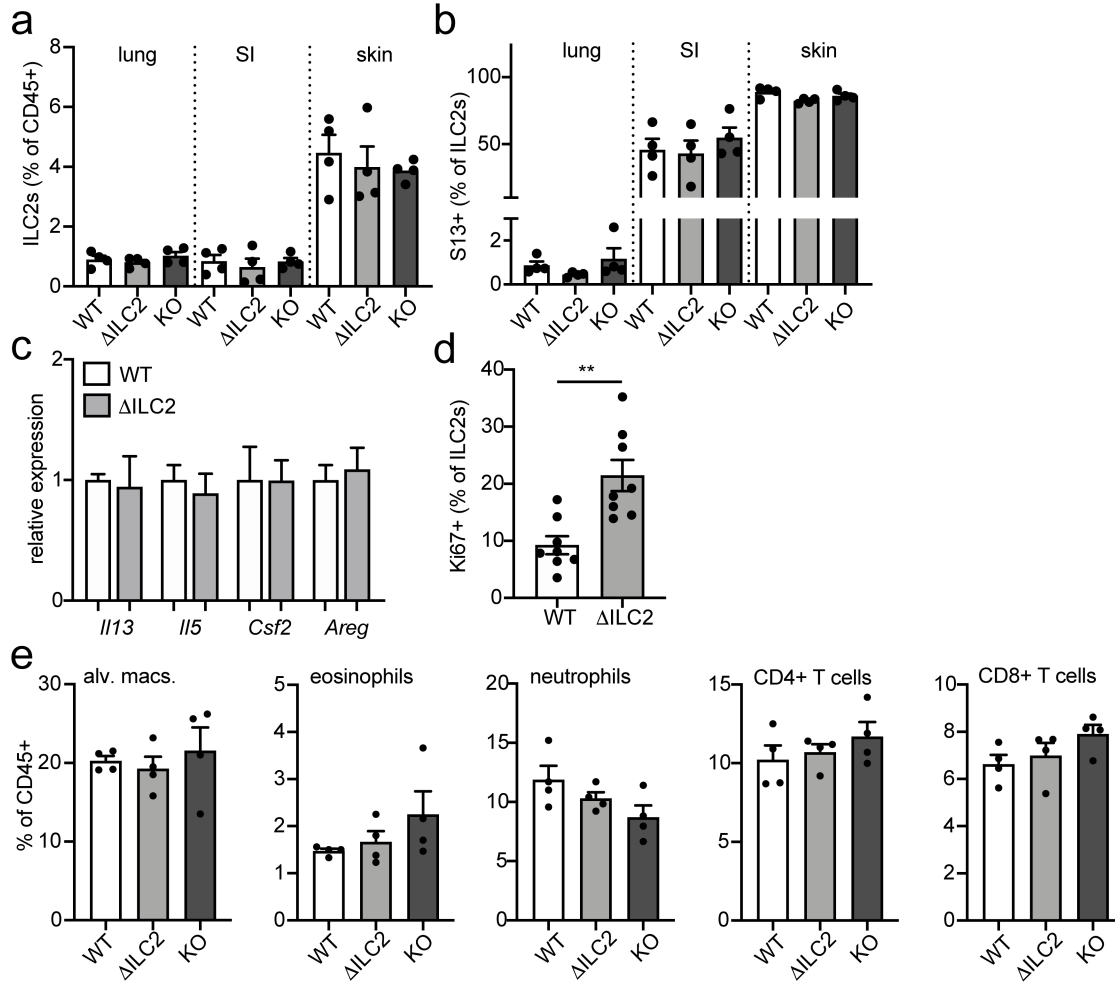

**Supplementary Figure 4: Loss of CISH in ILC2s yields increased tissue ILC2 turnover without affecting steady state numbers. a** Proportion of ILC2s in the lung, SI, and skin. n = 4

mice/group, representative of 2 similar experiments. **b** IL-13 expression in ILC2s in the lung, SI, and skin. n = 4 mice/group. **c** Expression of indicated effector genes in sorted lung ILC2s. n = 3-

9 mice/group, pooled from 2 of 3 similar experiments. **d** Ki67 expression measured by flow cytometry from freshly-isolated SI ILC2s. n = 8 mice/group, pooled from 2 similar experiments.

\*\*p<0.01. **e** Leukocyte subsets (as indicated) in from lung of untreated mice. n = 4 mice/group, representative of 2 similar experiments.

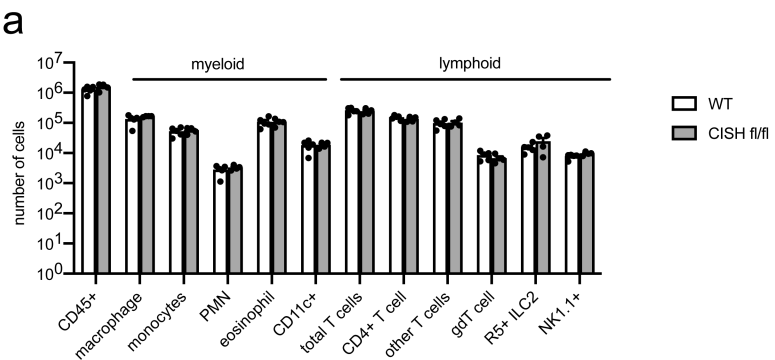

Supplementary Figure 5: Loss of CISH in ILC2s yields no significant differences in numbers of intestinal immune cells during *Salmonella* infection. **a** number of cells counted per centimeter of jejunum.

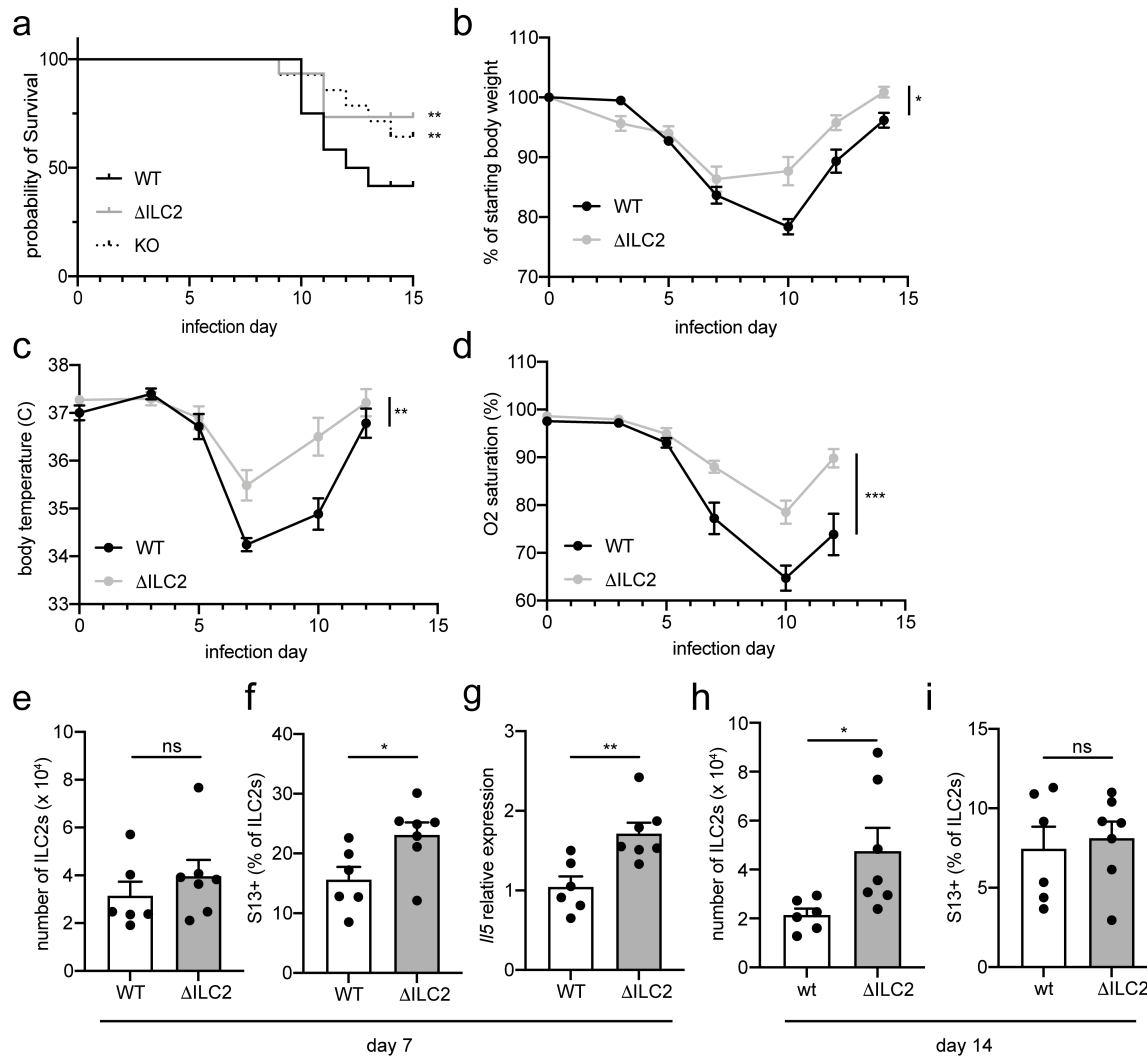

**Supplementary Figure 6: Augmented ILC2 activity through CISH deletion improves survival**

**during influenza infection.** **a** Survival after influenza PR8 in indicated strains. n = 12-15 mice per group, pooled from two experiments. **b** Body weight, **c** body temperature and, **d** oxygen saturation measured in indicated genotypes. for (a-d), \*p<0.05, \*\*p<0.01, \*\*\*p<0.001 for differences between genotype by 2-way ANOVA. n = 7 mice/group. **e** Number of lung ILC2s and **f** S13 reporter expression on lung ILC2s on day 7 of influenza infection. **g** *I/5* transcripts in whole lung tissue on day 7 of influenza infection. **h** number of lung ILC2s and **i** S13 reporter



expression on lung ILC2s on day 14 of influenza infection. for (e-i), \* $p < 0.05$ , \*\* $p < 0.01$ , ns = non-significant by t-test. n = 6-7 mice/group.

Supplementary Table 1: Antibodies usedSupplementary Table 2: Primers used for qRT-PCR

| <b>Gene symbol</b> | <b>Forward Primer</b>        | <b>Reverse Primer</b>    |
|--------------------|------------------------------|--------------------------|
| <i>Areg</i>        | CAGCTATTGGCATCGGCATC         | TTCAACTTTTACCCTGCATTGTCC |
| <i>Ccl2</i>        | AGGTCCCTGTCATGCTTCTGG        | CTGCTGCTGGTGATCCTCTTG    |
| <i>Cd36</i>        | GCTTGCAACTGTCAGCACAT         | GCCTTGCTGTAGCCAAGAAC     |
| <i>Chil3</i>       | CAGGTCTGGCAATTCTTCTGAA       | GTCTTGCTCATGTGTGTAAGTGA  |
| <i>Cish</i>        | ATGGTCCTTTGCGTACAGGG         | GGAATGCCCCAGTGGGTAAG     |
| <i>Clec10a</i>     | CAGAATCGCTTAGCCAATGTGG       | TCCCAGTCCGTGTCCGAAC      |
| <i>Csf2</i>        | TCAGAGAGAAAGGCTAAGGTCC       | CTCTTCATTCAACGTGACAGGC   |
| <i>Cxcl10</i>      | CCAAGTGCTGCCGTCATTTTC        | GGCTCGCAGGGATGATTTCAA    |
| <i>Cxcl9</i>       | TCCTTTTGGGCATCATCTTCC        | TTTGTAGTGGATCGTGCCCTCG   |
| <i>Hprt</i>        | GTTGGATACAGGCCAGACTTTGTTG    | GAGGGTAGGCTGGCCTATAGGCT  |
| <i>Ifng</i>        | CATTGAAAGCCTAGAAAGTCTGAATAAC | TGGCTCTGCAGGATTTTCATG    |
| <i>Il10</i>        | GCTGGACAACATACTGCTAACCG      | CCTTGCTCTTATTTTCACAGGGG  |
| <i>Il13</i>        | GGATATTGCATGGCCTCTGTAAC      | AACAGTTGCTTTGTGTAGCTGA   |
| <i>Il17a</i>       | AGCAGCGATCATCCCTCAAAG        | GTCTTCATTGCGGTGGAGAGTC   |
| <i>Il2</i>         | TGAGCAGGATGGAGAATTACAGG      | GTCCAAGTTCATCTTCTAGGCAC  |
| <i>Il22</i>        | TCAGACAGGTTCCAGCCCTA         | CAGGTCCAGTTCCTCCAATCG    |
| <i>Il4</i>         | GCTCGTCTGTAGGGCTTCC          | GTGCAGCTTATCGATGAATCCAG  |
| <i>Il5</i>         | CTCTGTTGACAAGCAATGAGACG      | TCTTCAGTATGTCTAGCCCCTG   |
| <i>Il9</i>         | ATGTTGGTGACATACATCCTTGC      | TGACGGTGGATCATCCTTCAG    |
| <i>Nos2</i>        | GAATCTTGGAGCGAGTTGTGG        | CAGGAAGTAGGTGAGGGCTTG    |
| <i>Retnla</i>      | CCAATCCAGCTAACTATCCCTCC      | ACCCAGTAGCAGTCATCCCA     |
| <i>Rpl13a</i>      | GAGGTCGGGTGGAAGTACCA         | TGCATCTTGGCCTTTTCCTT     |
| <i>Tnfa</i>        | TCTGTCTACTGAACTTCGGGGTG      | ACTTGGTGGTTTGCTACGACG    |

Supplementary Table 3: List of gene symbols for consensus “tuft cell” and “goblet cell” identities corresponding to heatmaps in Figure 3c and Supplementary Figure 3b

Supplementary Table 4: Selected outputs from Gene Set Enrichment Analysis

Supplementary Table 1: Antibodies used

| Antigen                            | Clone    | vendor                   | Catalog #       |
|------------------------------------|----------|--------------------------|-----------------|
| <b>Anti-Mouse FACS antibodies</b>  |          |                          |                 |
| Anti-mouse CD45 BUV395             | 30-F11   | BD                       | Cat# 565967     |
| Anti-mouse CD45 BV 711             | 30-F11   | BioLegend                | Cat# 103147     |
| Anti-mouse CD125 PE                | T21      | BD Biosciences           | Cat# 558488     |
| Anti-mouse SiglecF PerCP-Cy™5.5    | E50-2440 | BD Biosciences           | Cat# 565526     |
| Anti-mouse CD11b BV650             | M1/70    | BioLegend                | Cat# 101239     |
| Anti-mouse CD11c BV785             | N418     | BioLegend                | Cat# 117335     |
| Anti-mouse CD127 APC-eFluor® 780   | A7R34    | eBioscience/ThermoFisher | Cat# 47-1271-82 |
| Anti-mouse Gr-1 APC                | RB6-8C5  | BioLegend                | Cat# 108412     |
| Anti-mouse ST2 PE                  | DJ8      | MD Biosciences           | Cat# 101001PE   |
| Anti-mouse ST2 Biotin              | DJ8      | MD Biosciences           | Cat# 101001B    |
| Anti-mouse CD3 PE-Cy7              | 17A2     | BioLegend                | Cat# 100220     |
| Anti-mouse CD3 APC-Cy7             | 17A2     | BioLegend                | Cat# 100222     |
| Anti-mouse CD3 BV711               | 17A2     | BioLegend                | Cat# 100241     |
| Anti-mouse Thy1.2 BV605            | 53-2.1   | BioLegend                | Cat# 140317     |
| Anti-mouse Thy1.2 BV785            | 30-H12   | BioLegend                | Cat# 105331     |
| Anti-mouse CD4 PerCP               | RM4-5    | eBioscience/ThermoFisher | Cat# 45-0042-82 |
| Anti-human/mouse GATA3 AF488       | TWAJ     | eBioscience/ThermoFisher | Cat# 53-9966-42 |
| Anti-mouse Foxp3 PE                | FJK-16s  | eBioscience/ThermoFisher | Cat# 12-5773-82 |
| Anti-mouse T-bet PE-Cy7            | 4B10     | eBioscience/ThermoFisher | Cat# 25-5825-80 |
| Anti-mouse Ki67 FITC               | SolA15   | eBioscience/ThermoFisher | Cat# 11-5698-82 |
| <b>Anti-Mouse Lineage cocktail</b> |          |                          |                 |
| Anti-mouse CD8a PB                 | 53-6.7   | BioLegend                | Cat# 100725     |
| Anti-mouse CD49b PB                | DX5      | BioLegend                | Cat# 108918     |
| Anti-mouse NK-1.1 PB               | PK136    | BioLegend                | Cat# 108722     |
| Anti-mouse Gr-1 PB                 | RB6-8C5  | BioLegend                | Cat# 108430     |
| Anti-mouse TER-119 PB              | TER-119  | BioLegend                | Cat# 116232     |
| Anti-mouse FcεR1a PB               | Mar-1    | BioLegend                | Cat# 134314     |
| Anti-mouse CD3 PB                  | 17A2     | BioLegend                | Cat# 100214     |
| Anti-mouse CD19 PB                 | 6D5      | BioLegend                | Cat# 115523     |
| Anti-mouse CD11c PB                | N418     | BioLegend                | Cat# 117322     |
| Anti-mouse/human CD11b PB          | M1/70    | BioLegend                | Cat# 101224     |

|                                   |            |             |              |
|-----------------------------------|------------|-------------|--------------|
| Anti-mouse CD4 PB                 | RM4-5      | BioLegend   | Cat# 100534  |
| Anti-mouse F4/80 PB               | BM8        | BioLegend   | Cat# 123124  |
| <b>Anti-human FACS antibodies</b> |            |             |              |
| Anti-human CD4 APC                | RPA-T4     | eBioscience | Cat# 17-0049 |
| <b>Immunofluorescence</b>         |            |             |              |
| Anti-mouse DCLK1                  | polyclonal | Abcam       | Cat# ab31704 |
| Anti-RFP                          | polyclonal | SicGen      | Cat# AB8181  |
| Anti-mouse EpCAM AF647            | G8.8       | BioLegend   | Cat# 118211  |
| Goat anti-rabbit IgG AF488        | polyclonal | Invitrogen  | Cat# A-11070 |
| Donkey anti-goat IgG AF555        | polyclonal | Invitrogen  | Cat# A-21432 |

Supplementary Table 3: Gene symbols for consensus “tuft” and “goblet” identities corresponding to heatmaps in Fig. 3c and Suppl. Fig. 3b

| <b>Tuft cell</b> |                      |
|------------------|----------------------|
| <i>Dclk1</i>     | <i>Tmem176a</i>      |
| <i>Alox5ap</i>   | <i>Smpx</i>          |
| <i>Sox9</i>      | <i>Itpr2</i>         |
| <i>Spib</i>      | <i>Siglecf</i>       |
| <i>Avil</i>      | <i>Ffar3</i>         |
| <i>Trpm5</i>     | <i>Rac2</i>          |
| <i>Il17rb</i>    | <i>Hmx2</i>          |
| <i>Chat</i>      | <i>Inpp5j</i>        |
| <i>Plcb2</i>     | <i>Ptgs1</i>         |
| <i>Lrmp</i>      | <i>Pik3cg</i>        |
| <i>Hck</i>       | <i>Cd24a</i>         |
| <i>Rgs13</i>     | <i>Ethe1</i>         |
| <i>Fyb</i>       | <i>Inpp5d</i>        |
| <i>Ptpn6</i>     | <i>Krt23</i>         |
| <i>Snrnp25</i>   | <i>Gprc5c</i>        |
| <i>Kctd12</i>    | <i>Reep5</i>         |
| <i>Hpgds</i>     | <i>Tmem176b</i>      |
| <i>Tuba1a</i>    | <i>Ildr1</i>         |
| <i>Pik3r5</i>    | <i>Rgs2</i>          |
| <i>Vav1</i>      | <i>Pla2g4a</i>       |
| <i>Tspan6</i>    | <i>Rbm38</i>         |
| <i>Skap2</i>     | <i>Gga2</i>          |
| <i>Pygl</i>      | <i>Myo1b</i>         |
| <i>Ly6g6d</i>    | <i>Ppp3ca</i>        |
| <i>Alox5</i>     | <i>Gimap1</i>        |
| <i>Bmx</i>       | <i>Krt18</i>         |
| <i>Ptpn18</i>    | <i>2210016L21Rik</i> |

| <b>Goblet cell</b> |                 |
|--------------------|-----------------|
| <i>Kdelr3</i>      | <i>Galnt12</i>  |
| <i>Tnfaip8</i>     | <i>Agr2</i>     |
| <i>Dnajc10</i>     | <i>Txndc5</i>   |
| <i>Cmtm7</i>       | <i>Sdf2l1</i>   |
| <i>Smim14</i>      | <i>Stard3nl</i> |
| <i>Serp1</i>       | <i>Ccl9</i>     |
| <i>Klf4</i>        | <i>Spink4</i>   |
| <i>Creld2</i>      | <i>Tff3</i>     |
| <i>Pdia5</i>       | <i>Clca1</i>    |
| <i>Sec61b</i>      | <i>Atoh1</i>    |
| <i>Ern2</i>        | <i>Guca2a</i>   |
| <i>Xbp1</i>        |                 |
| <i>Nans</i>        |                 |
| <i>Scin</i>        |                 |
| <i>S100a6</i>      |                 |
| <i>Ramp1</i>       |                 |
| <i>Muc2</i>        |                 |
| <i>Ergic1</i>      |                 |
| <i>Pdia3</i>       |                 |
| <i>Ssr2</i>        |                 |
| <i>Tmed9</i>       |                 |
| <i>Creb3l1</i>     |                 |
| <i>Slc50a1</i>     |                 |
| <i>Qsox1</i>       |                 |
| <i>Tmed3</i>       |                 |
| <i>Tsta3</i>       |                 |
| <i>Foxa3</i>       |                 |

|               |                |
|---------------|----------------|
| <i>Nebi</i>   | <i>Tmem9</i>   |
| <i>Limd2</i>  | <i>Fam221a</i> |
| <i>Pea15a</i> | <i>Atp2a3</i>  |

|                |
|----------------|
| <i>Wars</i>    |
| <i>Slc12a8</i> |
| <i>Ssr4</i>    |

Supplementary Table 4: Selected outputs from Gene Set Enrichment Analysis

|                                                                  | ES    | NES   | NOM p-val | FDR q-val |
|------------------------------------------------------------------|-------|-------|-----------|-----------|
| <b>Small intestine: enriched WT&gt;KO</b>                        |       |       |           |           |
| REACTOME_CYCLIN_A_B1_B2_ASSOCIATED_EVENTS_DURING_G2_M_TRANSITION | 0.67  | 2.11  | 0         | 0.02      |
| REACTOME_INTERLEUKIN_7_SIGNALING                                 | 0.6   | 1.7   | 0.01      | 0.73      |
| REACTOME_REGULATION_OF_MITOTIC_CELL_CYCLE                        | 0.42  | 1.7   | 0         | 0.62      |
| REACTOME_CYCLIN_A:CDK2_ASSOCIATED_EVENTS_AT_S_PHASE_ENTRY        | 0.4   | 1.66  | 0         | 0.53      |
| REACTOME_REGULATION_OF_PTEN_STABILITY_AND_ACTIVITY               | 0.41  | 1.6   | 0.01      | 0.49      |
| BIOCARTA_G2_PATHWAY                                              | 0.5   | 1.58  | 0.03      | 0.43      |
| <b>Small intestine: enriched KO&gt;WT</b>                        |       |       |           |           |
| REACTOME_PEROXISOMAL_LIPID_METABOLISM                            | -0.69 | -2.13 | 0         | 0.01      |
| REACTOME_REGULATION_OF_CHOLESTEROL_BIOSYNTHESIS_BY_SREBP_SREBF   | -0.51 | -1.93 | 0         | 0.06      |
| REACTOME_CHOLESTEROL_BIOSYNTHESIS                                | -0.6  | -1.92 | 0         | 0.05      |
| REACTOME_METABOLISM_OF_STEROIDS                                  | -0.4  | -1.67 | 0         | 0.28      |
| KEGG_STEROID_BIOSYNTHESIS                                        | -0.59 | -1.66 | 0.01      | 0.28      |
| REACTOME_FATTY_ACID_METABOLISM                                   | -0.37 | -1.66 | 0         | 0.26      |
| REACTOME_ACTIVATION_OF_GENE_EXPRESSION_BY_SREBF_SREBP            | -0.45 | -1.58 | 0.01      | 0.41      |
| REACTOME_INTERLEUKIN_4_AND_INTERLEUKIN_13_SIGNALING              | -0.37 | -1.52 | 0.01      | 0.48      |
| <b>Lung: enriched WT&gt;KO</b>                                   |       |       |           |           |
| GO_MITOTIC_G2_DNA_DAMAGE_CHECKPOINT                              | 0.56  | 1.68  | 0.01      | 1         |
| GO_MITOTIC_G2_M_TRANSITION_CHECKPOINT                            | 0.47  | 1.6   | 0.01      | 1         |
| GO_INTERLEUKIN_7_MEDIATED_SIGNALING_PATHWAY                      | 0.55  | 1.57  | 0.05      | 1         |
| GO_G0_TO_G1_TRANSITION                                           | 0.42  | 1.55  | 0.03      | 1         |
| REACTOME_INTERLEUKIN_7_SIGNALING                                 | 0.52  | 1.55  | 0.06      | 1         |
| <b>Lung: enriched KO&gt;WT</b>                                   |       |       |           |           |
| HALLMARK_CHOLESTEROL_HOMEOSTASIS                                 | -0.51 | -2.03 | 0         | 0.37      |
| GO_REGULATION_OF_OXIDATIVE_PHOSPHORYLATION                       | -0.61 | -1.89 | 0         | 0.79      |

|                                                     |       |       |      |      |
|-----------------------------------------------------|-------|-------|------|------|
| GO_STEROL_METABOLIC_PROCESS                         | -0.42 | -1.65 | 0    | 0.61 |
| REACTOME_INTERLEUKIN_4_AND_INTERLEUKIN_13_SIGNALING | -0.38 | -1.63 | 0    | 0.59 |
| GO_TYPE_2_IMMUNE_RESPONSE                           | -0.48 | -1.59 | 0.02 | 0.72 |
